# Supplementary material for: Flexible thermosensitive films based on shallow-trap persistent luminescence for high-resolution texture imaging of fingerprints even through latex gloves
Source: Royal Society of Chemistry journal article supplement (doi:10.1039/d1tc01888d), 2021-01-01
Supplement: d1tc01888d1.pdf [file d1tc01888d1.pdf]

## Supporting Information

### Flexible thermosensitive films based on shallow-trap persistent luminescence for high-resolution texture imaging of fingerprints even through latex gloves

Shenghui Zheng,<sup>ab</sup> Junpeng Shi,<sup>c</sup> Xiaodan Wang,<sup>ab</sup> Xiaoyan Fu,<sup>d\*</sup> Hongyong Fan,<sup>ab</sup> and Hongwu Zhang<sup>ae\*</sup>

- <sup>a</sup> Key Lab of Urban Pollutant Conversion, Institute of Urban Environment, Chinese Academy of Sciences, Xiamen, 361021, China. E-mail: hwzhang@iue.ac.cn
- <sup>b</sup> University of Chinese Academy of Sciences, No. 19A Yuquan Road, Beijing 100049, China.
- <sup>c</sup> Key Laboratory of Design and Assembly of Functional Nanostructures, Fujian Institute of Research on the Structure of Matter, Chinese Academy of Sciences, Fuzhou 350002, China
- <sup>d</sup> College of Materials Science and Engineering, Key Laboratory of Functional Materials and Applications of Fujian Province, Xiamen University of Technology, Xiamen 361024, China. E-mail: fuxiaoyan@xmut.edu.cn
- <sup>e</sup> School of Chemistry and Material Sciences, Ludong University, Yantai 264025, China

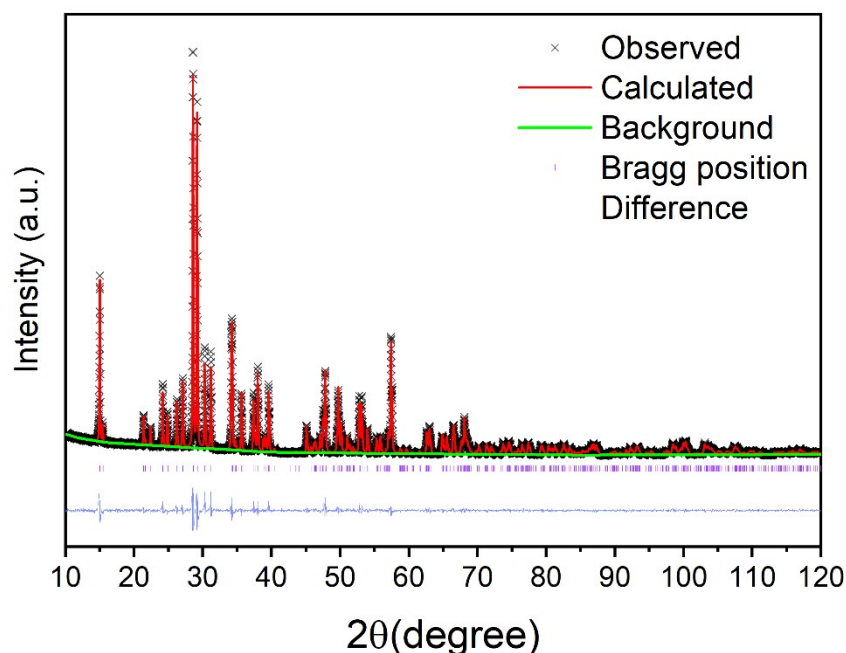

**Fig. S1** Rietveld refinement of  $\text{Bi}_{1.98}\text{Ga}_{3.99}\text{O}_9:2\%\text{Eu}^{3+},1\%\text{Cr}^{3+}$  at RT. The Rietveld refinement was analysis using the general structure analysis system (GSAS).<sup>[1,2]</sup> The refinement results converged to  $R_p = 4.38\%$  and  $R_{wp} = 5.91\%$ .

Table S1. The refinement parameters of  $\text{Bi}_2\text{Ga}_4\text{O}_9$ ,  $\text{Bi}_2\text{Ga}_{3.99}\text{O}_9:1\%\text{Cr}^{3+}$  and  $\text{Bi}_{1.98}\text{Ga}_4\text{O}_9:2\%\text{Eu}^{3+},1\%\text{Cr}^{3+}$  phosphors.

| Formula                       | $\text{Bi}_2\text{Ga}_4\text{O}_9$ | $\text{Bi}_2\text{Ga}_{3.99}\text{O}_9:1\%\text{Cr}^{3+}$ | $\text{Bi}_{1.98}\text{Ga}_4\text{O}_9:2\%\text{Eu}^{3+},1\%\text{Cr}^{3+}$ |
|-------------------------------|------------------------------------|-----------------------------------------------------------|-----------------------------------------------------------------------------|
| Space group                   | Pbam                               | Pbam                                                      | Pbam                                                                        |
| a (Å)                         | 7.932                              | 7.928                                                     | 7.925                                                                       |
| b (Å)                         | 8.312                              | 8.309                                                     | 8.302                                                                       |
| c (Å)                         | 5.913                              | 5.910                                                     | 5.896                                                                       |
| $\alpha=\beta=\gamma$ (°)     | 90                                 | 90                                                        | 90                                                                          |
| Cell volume (Å <sup>3</sup> ) | 389.698                            | 389.314                                                   | 387.918                                                                     |
| R <sub>p</sub> (%)            | 4.50                               | 4.87                                                      | 4.38                                                                        |
| R <sub>wp</sub> (%)           | 6.33                               | 6.52                                                      | 5.91                                                                        |

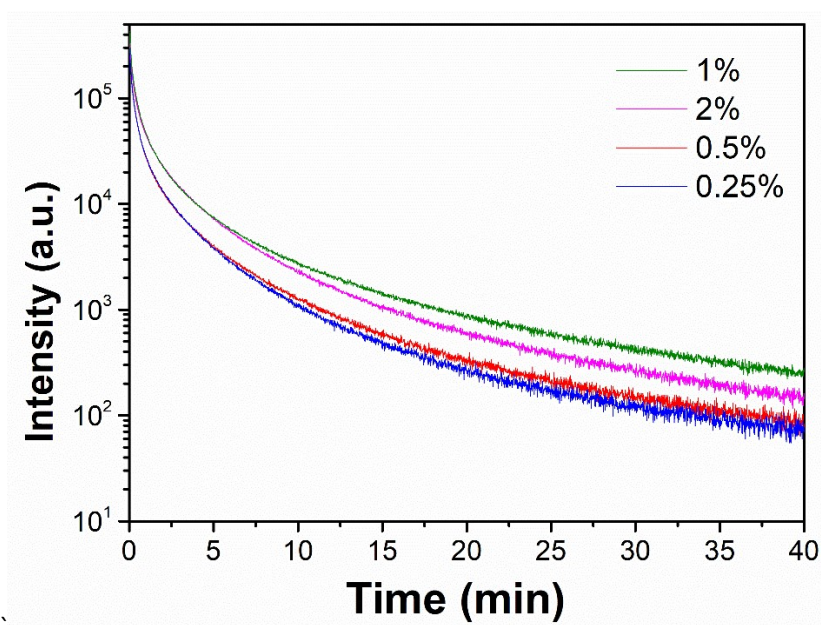

**Fig. S2** The PersL decay curves of BGO with different  $\text{Cr}^{3+}$  concentration after 254 nm charging for 2 min.

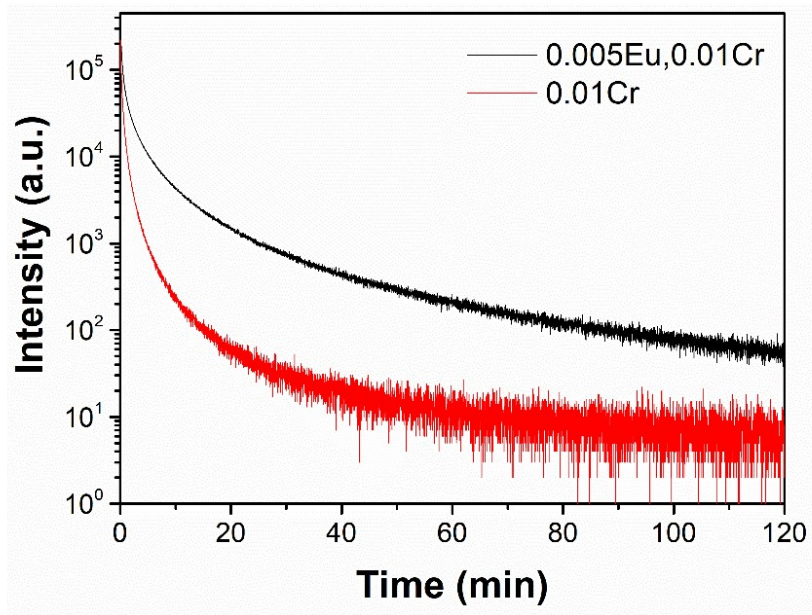

**Fig. S3** The PersL decay curve of  $\text{Bi}_2\text{Ga}_4\text{O}_9:1\%\text{Cr}^{3+}$  and  $\text{Bi}_2\text{Ga}_4\text{O}_9:0.5\%\text{Eu}^{3+}, 1\%\text{Cr}^{3+}$ .

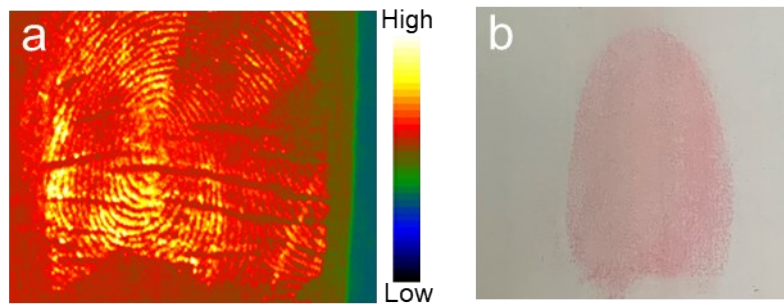

**Fig. S4** The detection results of fingerprints covered by latex gloves. (a) BGO films. (b) red stamp pad.

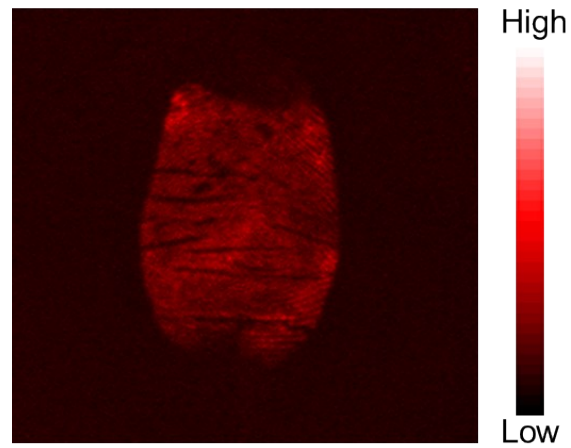

**Fig. S5** The fingerprint recorded result on smooth BGO-film without surface conical arrays.

#### References

- [1] B. H. Toby, R. B. Von Dreele, *J. Appl. Crystallogr.* **2013**, 46, 544.
- [2] B. H. Toby, *J. Appl. Crystallogr.* **2001**, 34, 210.
